# Supplementary material for: The morphologies and optical properties of three-dimensional GaN nano-cone arrays
Source: Royal Society of Chemistry journal article supplement (doi:10.1039/c6ra01280a), 2016-01-01
Supplement: c6ra01280a1.pdf [file c6ra01280a1.pdf]

## Supporting Information

### The morphologies and optical properties of three-dimensional GaN nano-cone arrays

Haotian Wang,<sup>ab&</sup> Guangmei Zhai,<sup>ab&</sup> Lin Shang,<sup>a</sup> Shufang Ma,<sup>a</sup> Wei Jia, Zhigang Jia,<sup>a</sup> Jian Liang,<sup>a</sup>  
Xuemin Li,<sup>a</sup> Bingshe Xu<sup>\*a</sup>

*a* Key Laboratory of Interface Science and Engineering in Advanced Materials of Ministry of Education of the People's Republic of China,  
Research Centre of Advanced Materials Science and Technology, Taiyuan University of Technology, Taiyuan, Shanxi 030024, China  
E-mail: [xubs@tyut.edu.cn](mailto:xubs@tyut.edu.cn); Fax: +86 351 6010311; Tel: +86 351 6010311

*b* State Key Laboratory of Electronic Thin Films and Integrated Devices, University of Electronic Science and Technology of China,  
Chengdu, Sichuan 610054, China

& These authors contributed equally to this work

#### Preliminary wet-etching experiments

The PL spectra of the sample firstly etched under 80W of ICP power and then dipped into 20% KOH aqueous solution at 50°C for 1, 3 and 5 minutes are shown in Fig. S1. It can be seen from Fig. S1 that the PL intensity of the GaN nano-cones wet-etched for 3 minutes is the largest.

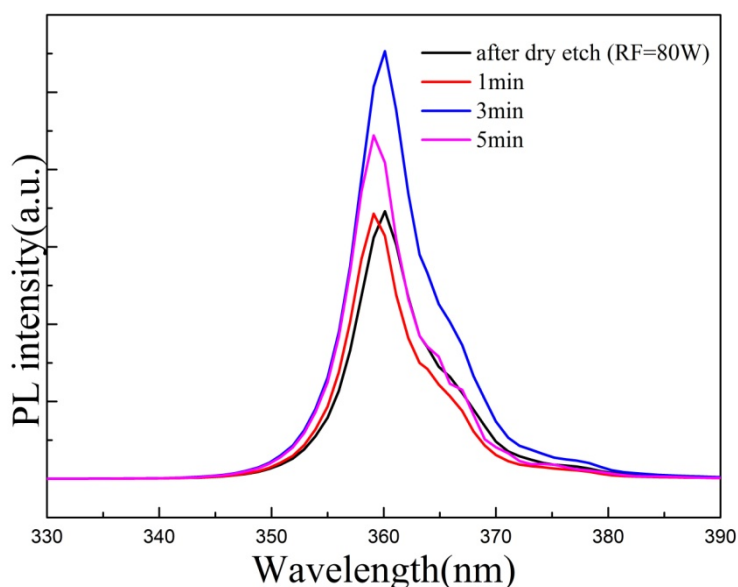

Fig. S1. PL spectra of GaN nano-cones treated with KOH aqueous solution for 1, 3 and 5 minutes, respectively.
